# Supplementary material for: Theoretical Prediction and Experimental Synthesis of Zr3AC2 (A = Cd, Sb) Phases
Source: MDPI journal article supplement (doi:10.3390/ma17071556), 2024-03-28
Supplement: s1 [file s1]

## **Supplementary Information**

Jia Luo<sup>1,†</sup>, Fengjuan Zhang<sup>1,†</sup>, Bo Wen<sup>1,†</sup>, Qiqiang Zhang<sup>1</sup>, Longsheng Chu<sup>1</sup>,  
Yanchun Zhou<sup>2,\*</sup>, Qingguo Feng<sup>1,\*</sup>, Chunfeng Hu<sup>1,\*</sup>

<sup>1</sup>*Key Laboratory of Advanced Technologies of Materials, Ministry of Education,  
School of Materials Science and Engineering, Southwest Jiaotong University,  
Chengdu 610031, China*

<sup>2</sup>*School of Materials Science and Engineering, Zhengzhou University, Zhengzhou  
450001, China*

†The authors contribute equally to the work

\*Corresponding authors:

Dr. Yanchun Zhou

School of Materials Science and Engineering

Zhengzhou University

Zhengzhou 450001, China

E-mail address: yczhou@alum.imr.ac.cn

Dr. Qingguo Feng

School of Materials Science and Engineering

Southwest Jiaotong University

Chengdu 610031, China

E-mail address: qfeng@swjtu.edu.cn

Dr. Chunfeng Hu

School of Materials Science and Engineering

Southwest Jiaotong University

Chengdu 610031, China

E-mail address: chfhu@live.cn

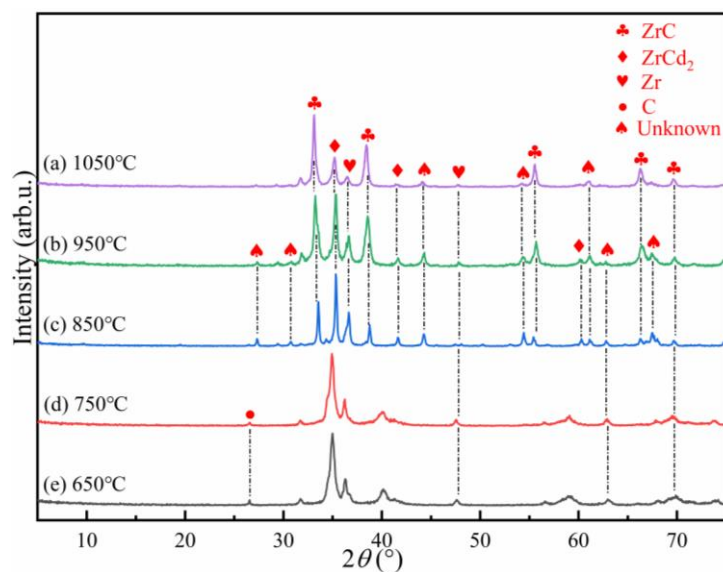

**Figure S1.** XRD patterns of  $\text{Zr}_3\text{CdC}_2$  samples with the molar ratio of  $\text{Zr} : \text{Cd} : \text{C} = 3 : 1.5 : 1.5$  synthesized at the different sintering temperature: (a) 1050 °C, (b) 950 °C, (c) 850 °C, (d) 750 °C, and (e) 650 °C.

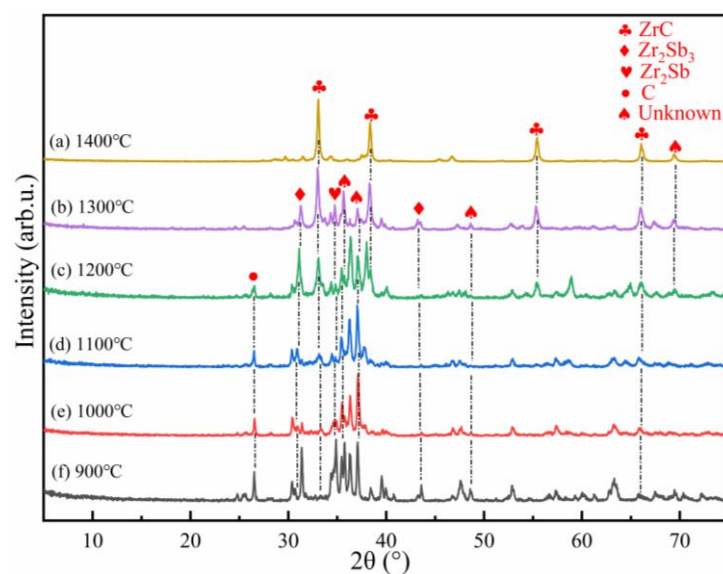

**Figure S2.** XRD patterns of  $\text{Zr}_3\text{SbC}_2$  samples with the molar ratio of  $\text{Zr} : \text{Sb} : \text{C} = 3 : 1.5 : 1.5$  synthesized at the different sintering temperature: (a) 1400 °C, (b) 1300 °C, (c) 1200 °C, (d) 1100 °C, (e) 1000 °C, and (f) 900 °C.

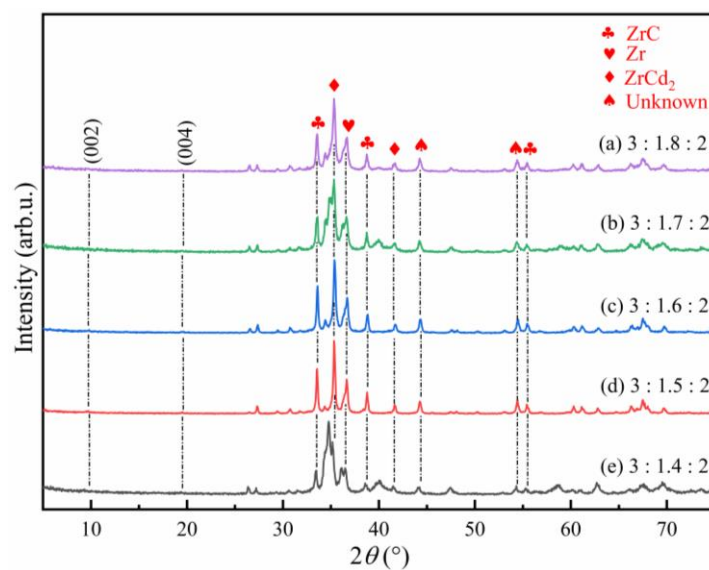

**Figure S3.** XRD patterns of  $\text{Zr}_3\text{CdC}_2$  samples synthesized at 850 °C with the different molar ratio of Zr, Cd, and C: (a) 3 : 1.8 : 2, (b) 3 : 1.7 : 2, (c) 3 : 1.6 : 2, (d) 3 : 1.5 : 2, and (e) 3 : 1.4 : 2.

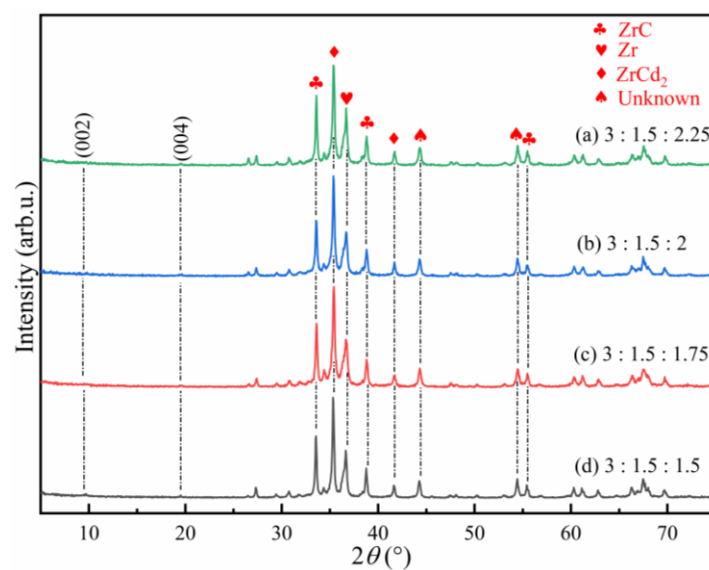

**Figure S4.** XRD patterns of  $\text{Zr}_3\text{CdC}_2$  samples synthesized at 850 °C with the different molar ratio of Zr, Cd, and C: (a) 3 : 1.5 : 2.25, (b) 3 : 1.5 : 2, (c) 3 : 1.5 : 1.75, and (d) 3 : 1.5 : 1.5.

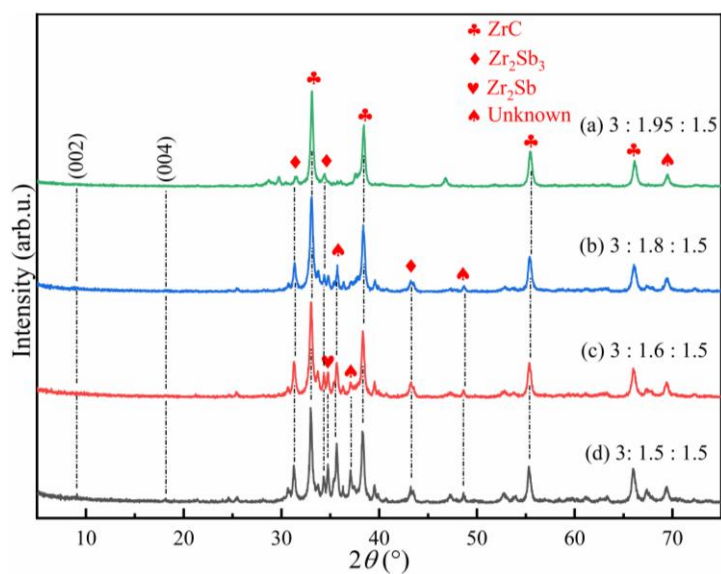

**Figure S5.** XRD patterns of  $\text{Zr}_3\text{SbC}_2$  samples synthesized at 1300 °C with the different molar ratio of Zr, Sb, and C: (a) 3 : 1.95 : 1.5, (b) 3 : 1.8 : 1.5, (c) 3 : 1.6 : 1.5, and (d) 3 : 1.5 : 1.5.

**Table S1.** Theoretical crystal parameters and atomic positions of  $\text{Zr}_3\text{CdC}_2$  and  $\text{Zr}_3\text{SbC}_2$  phases.

| Chemical formula      | $\text{Zr}_3\text{CdC}_2$ |     | $\text{Zr}_3\text{SbC}_2$  |
|-----------------------|---------------------------|-----|----------------------------|
| M (g/mol)             | 410.104                   |     | 419.453                    |
| Crystal system        | Hexagonal                 |     |                            |
| Space group           | $P6_3/mmc$ (No.194)       |     |                            |
| $a$ (Å)               | 3.319                     |     | 3.367                      |
| $c$ (Å)               | 20.393                    |     | 19.413                     |
| $V$ (Å <sup>3</sup> ) | 194.491                   |     | 190.603                    |
| $Z$                   | 2                         |     |                            |
| Atomic positions      | x                         | y   | z                          |
| M1                    | 0                         | 0   | 0                          |
| M2                    | 1/3                       | 2/3 | 0.126125[Cd], 0.131194[Sb] |
| A                     | 0                         | 0   | 1/4                        |
| C                     | 1/3                       | 2/3 | 0.568994[Cd], 0.571044[Sb] |

**Table S2.** Calculated data of reflections,  $2\theta$ ,  $d$ -spacing, and intensities of  $\text{Zr}_3\text{CdC}_2$  phase.

| $(hkl)$  | $2\theta_{\text{Cal.}} (^{\circ})$ | $d_{\text{Cal.}} (\text{\AA})$ | $I/I_{0\text{Cal.}} (\%)$ |
|----------|------------------------------------|--------------------------------|---------------------------|
| (0 0 2)  | 8.665                              | 10.197                         | 0.104                     |
| (0 0 4)  | 17.380                             | 5.098                          | 0.338                     |
| (0 0 6)  | 26.198                             | 3.399                          | 0.514                     |
| (1 0 0)  | 31.089                             | 2.874                          | 8.698                     |
| (1 0 1)  | 31.404                             | 2.846                          | 17.640                    |
| (1 0 2)  | 32.333                             | 2.767                          | 1.165                     |
| (1 0 3)  | 33.831                             | 2.647                          | 11.093                    |
| (0 0 8)  | 35.177                             | 2.549                          | 26.691                    |
| (1 0 4)  | 35.834                             | 2.504                          | 100.000                   |
| (1 0 5)  | 38.276                             | 2.350                          | 15.915                    |
| (1 0 6)  | 41.093                             | 2.195                          | 0.230                     |
| (1 0 7)  | 44.230                             | 2.046                          | 7.233                     |
| (0 0 10) | 44.385                             | 2.039                          | 0.174                     |
| (1 0 8)  | 47.643                             | 1.907                          | 7.326                     |
| (1 0 9)  | 51.300                             | 1.779                          | 6.645                     |
| (0 0 12) | 53.906                             | 1.699                          | 0.049                     |
| (1 0 10) | 55.178                             | 1.663                          | 0.039                     |
| (1 1 0)  | 55.312                             | 1.660                          | 25.671                    |
| (1 1 2)  | 56.104                             | 1.638                          | 0.046                     |
| (1 1 4)  | 58.436                             | 1.578                          | 0.085                     |
| (1 0 11) | 59.263                             | 1.558                          | 3.497                     |
| (1 1 6)  | 62.200                             | 1.491                          | 0.150                     |
| (1 0 12) | 63.546                             | 1.463                          | 17.360                    |
| (0 0 14) | 63.850                             | 1.457                          | 0.006                     |
| (2 0 0)  | 64.820                             | 1.437                          | 1.038                     |
| (2 0 1)  | 65.000                             | 1.434                          | 2.204                     |
| (2 0 2)  | 65.540                             | 1.423                          | 0.105                     |
| (2 0 3)  | 66.435                             | 1.406                          | 1.679                     |
| (1 1 8)  | 67.264                             | 1.391                          | 23.813                    |
| (2 0 4)  | 67.678                             | 1.383                          | 14.852                    |
| (1 0 13) | 68.029                             | 1.377                          | 2.169                     |
| (2 0 5)  | 69.260                             | 1.355                          | 2.565                     |
| (2 0 6)  | 71.171                             | 1.324                          | 0.041                     |
| (1 0 14) | 72.717                             | 1.299                          | 0.177                     |
| (2 0 7)  | 73.402                             | 1.289                          | 1.565                     |
| (1 1 10) | 73.515                             | 1.287                          | 0.191                     |
| (0 0 16) | 74.364                             | 1.275                          | 3.395                     |

**Table S3.** Calculated data of reflections,  $2\theta$ ,  $d$ -spacing, and intensities of  $\text{Zr}_3\text{SbC}_2$  phase.

| $(hkl)$  | $2\theta_{\text{Cal.}} (^{\circ})$ | $d_{\text{Cal.}} (\text{\AA})$ | $I/I_{0\text{Cal.}} (\%)$ |
|----------|------------------------------------|--------------------------------|---------------------------|
| (0 0 2)  | 9.103                              | 9.707                          | 2.584                     |
| (0 0 4)  | 18.265                             | 4.853                          | 0.589                     |
| (0 0 6)  | 27.546                             | 3.236                          | 0.015                     |
| (1 0 0)  | 30.635                             | 2.916                          | 9.770                     |
| (1 0 1)  | 30.987                             | 2.884                          | 18.829                    |
| (1 0 2)  | 32.023                             | 2.793                          | 1.142                     |
| (1 0 3)  | 33.685                             | 2.658                          | 8.302                     |
| (1 0 4)  | 35.899                             | 2.499                          | 100.000                   |
| (0 0 8)  | 37.015                             | 2.427                          | 22.327                    |
| (1 0 5)  | 38.582                             | 2.332                          | 18.753                    |
| (1 0 6)  | 41.662                             | 2.166                          | 1.173                     |
| (1 0 7)  | 45.078                             | 2.010                          | 3.457                     |
| (0 0 10) | 46.755                             | 1.941                          | 0.883                     |
| (1 0 8)  | 48.783                             | 1.865                          | 7.825                     |
| (1 0 9)  | 52.744                             | 1.734                          | 8.518                     |
| (1 1 0)  | 54.458                             | 1.684                          | 27.110                    |
| (1 1 2)  | 55.340                             | 1.659                          | 0.310                     |
| (0 0 12) | 56.868                             | 1.618                          | 0.156                     |
| (1 0 10) | 56.937                             | 1.616                          | 0.0205                    |
| (1 1 4)  | 57.932                             | 1.591                          | 0.192                     |
| (1 0 11) | 61.352                             | 1.510                          | 1.061                     |
| (1 1 6)  | 62.099                             | 1.493                          | -                         |
| (2 0 0)  | 63.785                             | 1.458                          | 1.232                     |
| (2 0 1)  | 63.986                             | 1.454                          | 2.382                     |
| (2 0 2)  | 64.587                             | 1.442                          | 0.129                     |
| (2 0 3)  | 65.582                             | 1.422                          | 1.310                     |
| (1 0 12) | 65.983                             | 1.415                          | 14.784                    |
| (2 0 4)  | 66.961                             | 1.396                          | 15.661                    |
| (0 0 14) | 67.490                             | 1.387                          | 0.188                     |
| (1 1 8)  | 67.680                             | 1.383                          | 22.737                    |
| (2 0 5)  | 68.715                             | 1.365                          | 3.191                     |
| (2 0 6)  | 70.830                             | 1.329                          | 0.259                     |
| (1 0 13) | 70.835                             | 1.329                          | 3.087                     |
| (2 0 7)  | 73.295                             | 1.290                          | 0.798                     |
| (1 1 10) | 74.549                             | 1.272                          | 1.277                     |
